# Supplementary material
Source: PubMed Central journal article supplement (PMC5987284)
Supplement: Supplementary_Material(4).pdf [file Supplementary_Material%284%29.pdf]

1 **SUPPLEMENTARY MATERIAL**

2

3 **MATERIALS AND METHODS**

4

5 **Patients**

6 The inclusion criteria comprised a positive diagnosis of all IBS subtypes (IBS with  
7 constipation [IBS-C], with diarrhea [IBS-D], mixed [IBS-M], or unsubtyped [IBS-U]), age  
8 between 18 and 65 years, negative colonoscopy or barium enema examination within the  
9 previous 2 years, and negative relevant additional screening or consultation whenever  
10 appropriate. Patients were excluded if they were pregnant, breast-feeding, or not using  
11 reliable methods of contraception. The exclusion criteria also included intestinal organic  
12 diseases, such as celiac disease ascertained by the detection of anti-transglutaminase,  
13 diverticular disease, or inflammatory bowel diseases (IBDs; e.g., Crohn's disease, ulcerative  
14 colitis, infectious colitis, ischemic colitis, or microscopic colitis); previous major abdominal  
15 surgery; untreated food intolerance, such as ascertained or suspected lactose intolerance as  
16 defined by anamnestic evaluation or, if appropriate, lactose breath test; consumption of  
17 probiotics or topical and/or systemic antibiotic therapy during the month before study  
18 enrolment; frequent consumption of contact laxatives; presence of any relevant organic,  
19 systemic, or metabolic disease as assessed by medical history, appropriate consultations,  
20 and laboratory tests; or abnormal laboratory values deemed clinically significant on the basis  
21 of predefined values.

22

23 **Analysis of the bacterial composition of fecal samples**

24 The bacterial community structure of the fecal microbiota was analyzed as described  
25 elsewhere with a few modifications.<sup>1-3</sup> Briefly, metagenomics DNA was extracted from ~200

26 mg of feces using the PowerSoil® DNA Isolation Kit (MO BIO Laboratories) according to the  
27 manufacturer's instructions. Subsequently, a partial region of the 16S ribosomal RNA (rRNA)  
28 gene was amplified using the primer pair Probio\_Uni and Probio\_Rev, targeting the V3  
29 region (19). Next, the distribution of 16S rRNA gene sequences in the stool metagenomic  
30 DNA was determined using an Illumina MiSeq System (19). The sequence reads were  
31 analyzed through the bioinformatic pipeline Quantitative Insights Into Microbial Ecology  
32 (QIIME) version 1.7.0 with the GreenGenes database updated to version 13.5. The relative  
33 abundance of bacteria in each fecal sample was reported at the taxonomic levels of phylum,  
34 class, order, family, and genus. Sequence reads have been deposited in the European  
35 Nucleotide Archive (ENA) of the European Bioinformatics Institute under accession code  
36 PRJEB18753.

37

### 38 **Quantification of fecal SCFAs**

39 SCFAs were quantified in the fecal samples as previously described.<sup>2</sup> Briefly, SCFAs were  
40 recovered from 100 mg of feces through two extractions with 2 ml of 0.001% HCOOH. The  
41 ultra-high-pressure liquid chromatography coupled with high resolution/high accuracy mass  
42 spectrometry (UPLC-HR-MS) analysis was carried out on an Acquity UPLC separation  
43 module (Waters, Milford, MA, USA) coupled with an Exactive Orbitrap MS through an HESI-II  
44 probe for electrospray ionisation (Thermo Scientific, San Jose, CA, USA). The UPLC eluate  
45 was analyzed by full scan MS in the 50-130 m/z range. The quantification of acetic, butyric,  
46 isobutyric, isovaleric, lactic, propionic, and valeric acids in fecal samples was performed  
47 using five-point external calibration curves.

48

### 49 **Fecal IgA and cytokine analysis**

50 Fecal IgA and cytokine production was detected in fecal samples collected as described in  
51 the Laboratory Manual. Secretory IgA (sIgA) and cytokines in fecal supernatants were

52 detected by an ELISA test as previously described.<sup>4</sup> Briefly, fecal supernatants were  
53 obtained after resuspension of 250 mg of the fecal sample in 4 volumes of PBS buffer  
54 containing Protease Inhibitor Cocktail (Sigma-Aldrich), followed by homogenization of the  
55 samples in a Precellys bead beater (3 x 30" at 6800 rpm; Advanced Biotech Italia s.r.l.,  
56 Seveso, Italy) and centrifugation at 13,000 rpm for 15 min at 4°C. Microtitre plates (Greiner)  
57 were coated with polyclonal rabbit anti-human IgA (Dako Immunoglobulins) in a 3-hour  
58 incubation at 37°C and then overnight at 4°C. The second day, fecal supernatants were  
59 incubated for 2 hours at 37°C, followed by the addition of secondary rabbit anti-human IgA  
60 antibody conjugated to horseradish peroxidase (HRP) (Dako) . The plate was read at 492 nm  
61 in a micro-plate reader (Sunrise, Tecan) and the IgA concentration extrapolated from a  
62 standard curve included in each plate.

63 Similarly, the production of IL6, IL8, IL10, IL12, IL15, interferon (IFN)- $\gamma$ , tumor  
64 necrosis factor (TNF)- $\alpha$ , and transforming growth factor (TGF)- $\beta$  in fecal supernatants was  
65 detected by a sandwich ELISA test. Microtitre plates were coated with monoclonal anti-  
66 human IL6, IL8, IL10, IL12, IL15, TNF- $\alpha$  (Thermo Scientific), IFN- $\gamma$  (Mabtech), and TGF-  
67  $\beta$  (R&D System) overnight at room temperature. The second day, fecal supernatant samples  
68 were incubated at room temperature for 1 hour, and then biotin-conjugated secondary  
69 antibodies were added. The plates were incubated with streptavidin (Thermo Scientific) for  
70 20 minutes and TMB solution (Thermo Scientific) to develop the enzymatic reaction. Plates  
71 were read at 450 nm in a micro-plate reader (Sunrise, Tecan) and cytokine concentrations  
72 extrapolated from a standard curve included in each plate. The analysis of fecal IgA and  
73 cytokines was centralized and performed at "Centro Interuniversitario di Immunità e  
74 Nutrizione", Department of Clinical Surgical Diagnostic and Paediatric Sciences, University of  
75 Pavia.

76

## 77 **Statistical analysis**

78 Statistical analyses of data concerning the intestinal microbial ecosystem (16S rRNA gene  
79 profile and SCFA quantification) were carried out using R statistic software (version 3.1.2). In  
80 order to measure valid outcomes, only participants with 100% compliance with the  
81 treatments and experiment protocol were included in the analysis (PP analysis). Because of  
82 the necessary cross-over design for significant results, ITT analysis was not carried out. The  
83 normal distribution was assessed for each variable under consideration using the Shapiro-  
84 Francia test performed for the composite hypothesis of normality; the P-value was calculated  
85 from the formula given by Royston.<sup>5</sup> If data followed a normal distribution, repeated  
86 measures ANOVA and two-tailed paired Student's t-test were used to find significant  
87 differences between the probiotic and placebo treatments. If normality was not satisfied for a  
88 specific variable, two different non-parametric tests were used: (i) the repeated measures  
89 Friedman test, which compares the two treatments, and (ii) the Wilcoxon-Mann-Whitney test,  
90 which considers the probiotic and placebo treatments separately, in order to highlight all  
91 treatment effects obscured by the repeated measured analysis. The Wilcoxon-Mann-Whitney  
92 test was performed with Benjamini-Hochberg correction to correct the p-value when the  
93 comparisons performed in the same analysis exceeded 10. Significance was set at  $P \leq 0.05$ ,  
94 and mean differences in the range  $0.05 < P < 0.10$  were accepted as trends. The correlation  
95 analyses were performed using the Kendall and Spearman formula with the items specified  
96 in the text as predictors and dependent variables.

97

98

99 **RESULTS**

100 **Effect of treatment on daily stool form**

101 Stool consistency was reported daily and assessed using the BSSF. Stool consistency was  
102 evaluated as the number and the proportion of patients who reported at least one stool  
103 sample of a particular type per week, according to Bristol scale. Patients could report more  
104 than one stool consistency per day (according to the number of daily stools): all the  
105 information collected were analysed. No significant differences were found in either the ITT  
106 set or PP set. Furthermore, patients were classified into subgroups according to the stool  
107 pattern observed during the run-in period. Overall, considering both treatment periods, 2/12  
108 (16.7%) patients with IBS-C treated with *Lactobacillus paracasei* CNCM I-1572 and 5/12  
109 (41.7%) patients with IBS-C treated with placebo had normalised bowel function (i.e., type 1  
110 or type 2 <25% during treatment period); 5/14 (35.7%) patients with IBS-D treated with  
111 *Lactobacillus paracasei* CNCM I-1572 and 5/13 (38.5%) patients with IBS-D treated with  
112 placebo had normalised bowel function (i.e., type 6 or type 7 <25% during treatment period);  
113 2/3 (66.7%) patients with IBS-M treated with *Lactobacillus paracasei* CNCM I-1572 and 0/3  
114 (0%) patients with IBS-M treated with placebo had normalised bowel function (i.e., type 1 or  
115 type 2 <25% and type 6 or type 7 <25% during treatment period). These differences were not  
116 statistically significant. We could not define normalisation for patients with IBS-U.

117

118 **Effect of treatment on overall satisfaction, HADS, and SF-12 health survey**

119 Considering summary statistics by treatment, the mean VAS value for overall satisfaction  
120 with treatment was 50.4±32.0 when patients took *Lactobacillus paracasei* CNCM I-1572 and  
121 41.3±31.6 when patients took placebo. Results from the cross-over analysis (considering

122 VAS values at the end of each treatment period as outcome) did not reveal significant  
123 effects.

124 Mixed models with repeated measures were applied considering the change in HADS score  
125 from the start to end of each treatment period as outcome, but there were no significant  
126 effects in the models. For the anxiety scores, the mean changes from the start to the end of  
127 the treatment period were negative in both the groups of patients: -0.18 and -0.54  
128 respectively. Interestingly, depression scores decreased, especially when patients took  
129 *Lactobacillus paracasei* CNCM I-1572. The mean change from the start to the end of the  
130 treatment period was -0.71 when patients took *Lactobacillus paracasei* CNCM I-1572 but  
131 only -0.08 when they took placebo. However, this difference was not significant (P=0.314).

132 SF-12 scores did not change from the start to the end of treatment for both *Lactobacillus*  
133 *paracasei* CNCM I-1572 and placebo. A cross-over analysis was applied considering the  
134 change in SF-12 score from the start to the end of each treatment period as outcome; a  
135 mixed model with repeated measures was applied but no significant variables were found in  
136 the model.

137

### 138 **Rescue medication**

139 The proportion of patients in the ITT set who took at least one rescue medication by period  
140 was similar between the two treatment groups (6 in each treatment group during the first  
141 period; 2 in the *Lactobacillus paracasei* CNCM I-1572 group vs. 4 in the placebo group  
142 during the second period). The differences between treatment groups were not significant.

143

### 144 **Effect of treatment on the gut microbiota**

145 The within-sample biodiversity of stools was analyzed in terms of bacterial richness and  
146 evenness ( $\alpha$ -diversity) using the Chao1, Shannon, and InvSimpson indexes. The differences

147 between *Lactobacillus paracasei* CNCM I-1572 and placebo in the three indexes were not  
148 significant; we only observed a trend of increase in the Shannon index ( $P=0.09$ , paired  
149 Student's t-test; Figure S1), which is an  $\alpha$ -diversity measure that simultaneously takes into  
150 account the number and evenness of taxonomic units. In addition, both *Lactobacillus*  
151 *paracasei* CNCM I-1572 and placebo did not significantly modify the inter-sample  
152 relationships ( $\beta$ -diversity) measured by principal coordinate analysis (PCoA) based on  
153 weighted and unweighted UniFrac distances (**Figure S2**).

154

### 155 **Correlations between microbiotic, clinical, and immunological features**

156 The relative abundance of bacterial taxa significantly affected by the *Lactobacillus paracasei*  
157 CNCM I-1572 intervention were used as predictor variables in correlation analyses with the  
158 clinical parameters (stool frequency and form, abdominal pain), immunological factors (IFN $\gamma$ ,  
159 IgA, IL15, TGF $\beta$ , and TNF $\alpha$ ), and SCFA levels in IBS subjects as dependent variables.  
160 Kendall's and Spearman's tests revealed a significant positive correlation between the genus  
161 *Lactobacillus* and isobutyrate, isovalerate, and lactate (see **Table 4** in the main text). In  
162 addition, the two Ruminococcaceae genera *Oscillospira* and *Ruminococcus* inversely  
163 correlated with the main SCFAs acetate, propionate, and butyrate. We also observed a  
164 positive correlation between *Parabacteroides* and fecal levels of IgA, and between  
165 *Oscillospira* and *Ruminococcus* and TGF $\beta$ . In addition, *Ruminococcus* inversely correlated  
166 with fecal levels of IFN $\gamma$  and IgA. Finally, we found that *Oscillospira* negatively correlated  
167 with stool frequency and form (see **Table 4** in the main text).

168   **REFERENCES**

169   1) Ferrario C, Taverniti V, Milani C, et al. Modulation of faecal Clostridiales bacteria and  
170   butyrate by probiotic intervention with *Lactobacillus paracasei* DG varies among healthy  
171   adults. *J Nutr* 2014; 144: 1787-96.

172   2) Gargari G, Taverniti V, Balzaretto S, et al. Consumption of a *Bifidobacterium bifidum* strain  
173   for 4 weeks modulates dominant intestinal bacterial taxa and faecal butyrate in healthy  
174   adults. *Appl Environ Microbiol* 2016;82:5850-9.

175   3) Duranti S, Gaiani F, Mancabelli L, et al. Elucidating the gut microbiome of ulcerative  
176   colitis: bifidobacteria as novel microbial biomarkers. *FEMS Microbiol Ecol* 2016;92: pii:  
177   fiw191.

178   4) Avanzini MA, Plebani A, Monafò V, et al. A comparison of secretory antibodies in breast-  
179   fed and formula-fed infants over the first six months of life. *Acta Paediatr* 1992; 81: 296-301.

180   5) Royston P. A pocket-calculator algorithm for the Shapiro-Francia test for non-normality: an  
181   application to medicine. *Stat Med* 1993; 12: 181-4.

182



183 **TABLES**

184

185 **Table S1.** Effect of treatment on faecal IgA and cytokines

|                  | <b>Placebo</b>  |                  |                  | <b><i>L. paracasei</i> CNCM I-1572</b> |                  |                  | <b><i>P</i> value</b> |
|------------------|-----------------|------------------|------------------|----------------------------------------|------------------|------------------|-----------------------|
|                  | <b>(n=40)</b>   |                  |                  | <b>(n=40)</b>                          |                  |                  |                       |
|                  | <b>Baseline</b> | <b>End-</b>      | <b>Change vs</b> | <b>Baseline</b>                        | <b>End-</b>      | <b>Change vs</b> |                       |
|                  |                 | <b>treatment</b> | <b>baseline</b>  |                                        | <b>treatment</b> | <b>baseline</b>  |                       |
| <b>IgA ng/g</b>  | 54.7 (73.6)     | 70.1 (81.3)      | 14.1 (74.6)      | 71.6 (98.7)                            | 66.2 (84.6)      | -5.4 (87.2)      | 0.068                 |
| <b>IL-6 pg/g</b> | 0.2 (0.9)       | 0.9 (3.2)        | 0.7 (3.1)        | 0.5 (1.3)                              | 0.2 (0.8)        | -0.2 (1.6)       | 0.056                 |
| <b>IL15 pg/g</b> | 209.9 (425.2)   | 244.2 (517.1)    | 35.4 (493.6)     | 394.3 (773.9)                          | 230.9 (514.9)    | -173.4 (634.8)   | 0.042                 |

186 Data are presented as mean±SD

187

188 **FIGURES**

189 **Figure S1.** Effect of the probiotic intervention on the within-sample bacterial biodiversity of  
 190 faecal samples ( $\alpha$ -diversity) based on three indexes (A) and statistical analysis (B).

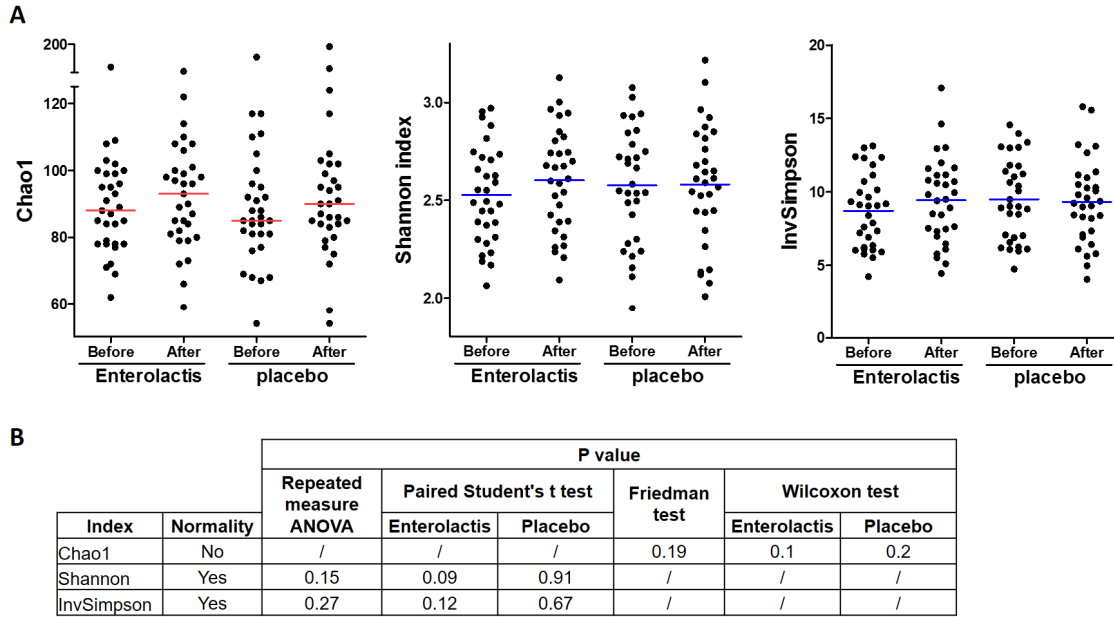

191

192

193 **Figure S2.** Principal coordinate analysis (PCoA) based on unweighted (A and B) and  
194 weighted (C and D) UniFrac distances for analysis of the  $\beta$ -diversity of faecal samples. The  
195 panels contain a bidimensional representation of the two most informative components  
196 explaining the differences between samples. Each point is represented by the overall  
197 microbiotic composition of a specific faecal specimen. Samples were divided into four  
198 categories: before and after *L. casei* DG<sup>®</sup> treatment (A, C), and before and after placebo  
199 treatment (C, D).  $\Sigma|v|$  is the sum of the absolute Euclidean distances of paired points  
200 calculated as the sum of square variances of the coordinates of each point before (i) and  
201 after (j) a treatment ( $|v| = \sqrt{[(x_i - x_j)^2 + (y_i - y_j)^2]}$ ). Paired points are the samples before (black  
202 point) and after (white point) a specific treatment for a specific subject.

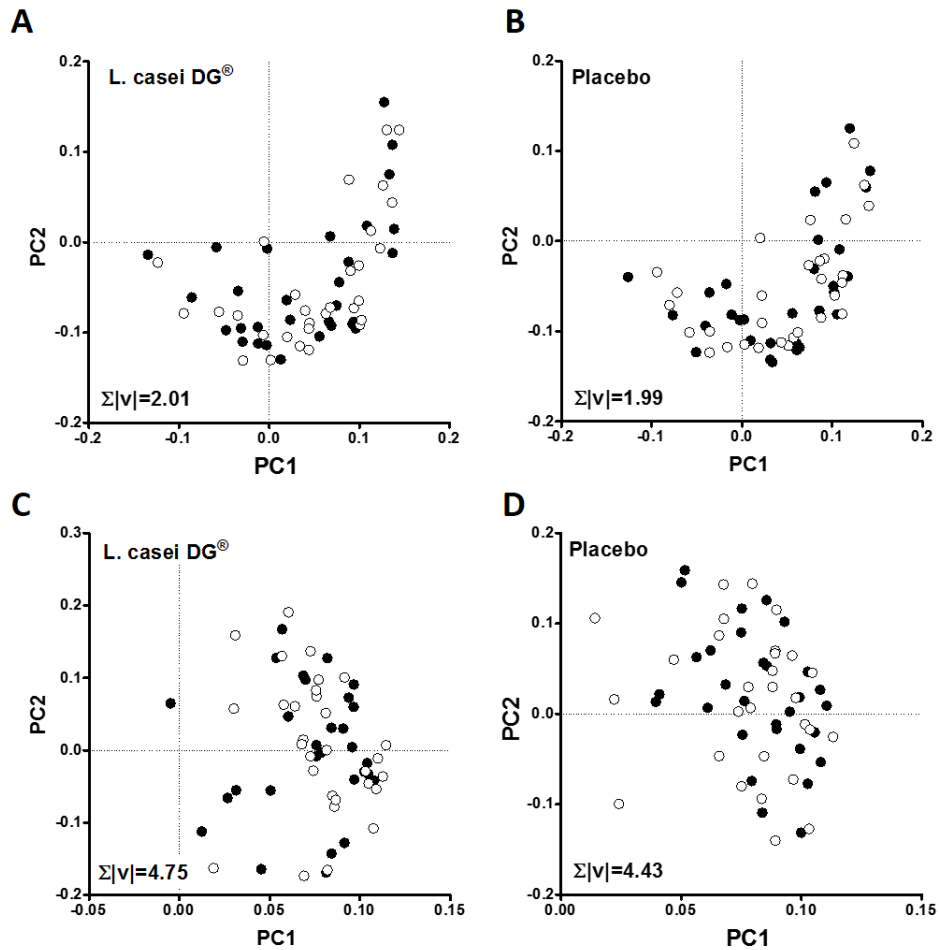

203

204 **Figure S3.** Rooted phylogenetic tree built using the Unweighted Pair Group Method with  
 205 Arithmetic Mean (UPGMA) on the basis of the clustalW alignment of the de novo sequences  
 206 associated with *Ruminococcus* and the corresponding 16S rRNA gene region of  
 207 *Ruminococcus* sp. type strains. Only de novo sequences with a relative abundance > 1% of  
 208 all *Ruminococcus*-associated reads were considered. The relative abundance of each de  
 209 novo sequence is reported parentheses relative to all *Ruminococcus* reads. Genbank  
 210 accession numbers are reported in brackets.

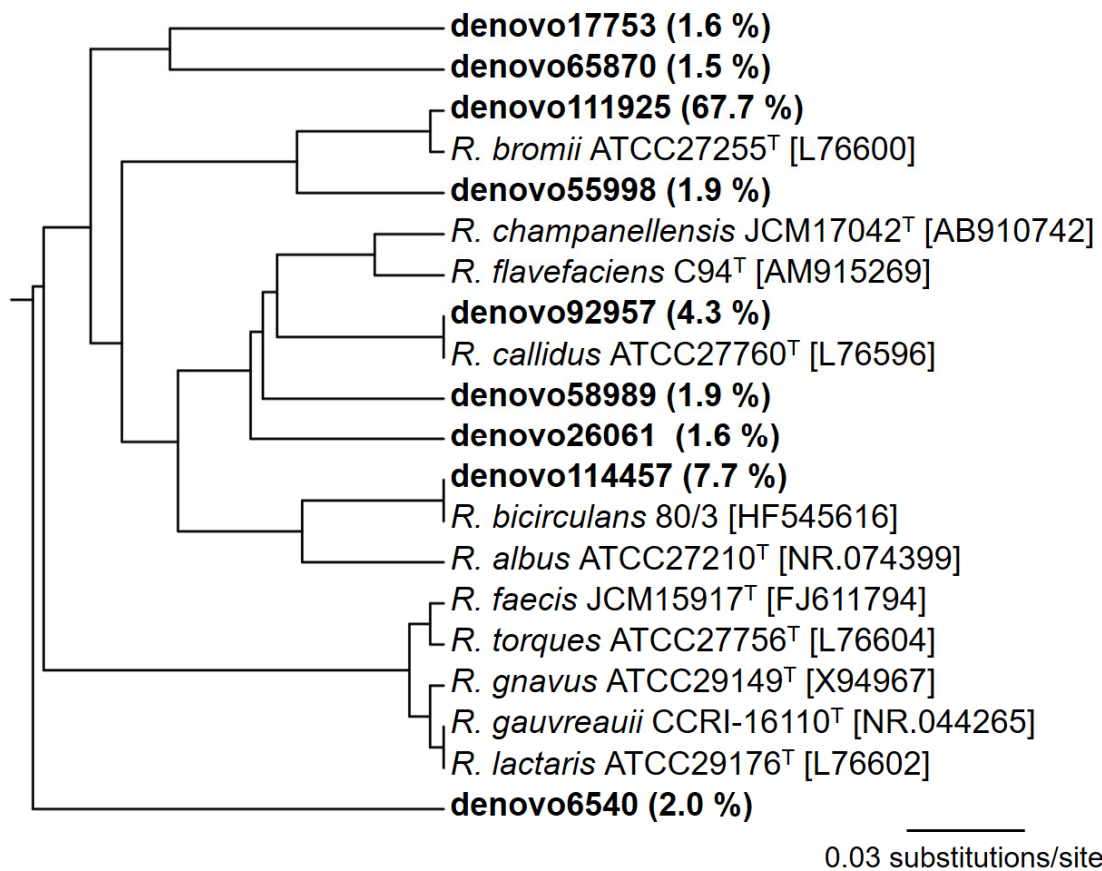

211

212

213 **Figure S4.** Faecal levels of acetate (A) and butyrate (B) in IBS patients following probiotic (L.  
214 casei DG<sup>®</sup>) or placebo treatment. The medians of each data set are indicated by red lines.  
215 \*P<0.05 according to paired Wilcoxon-Mann-Whitney test with Benjamini-Hochberg  
216 correction.

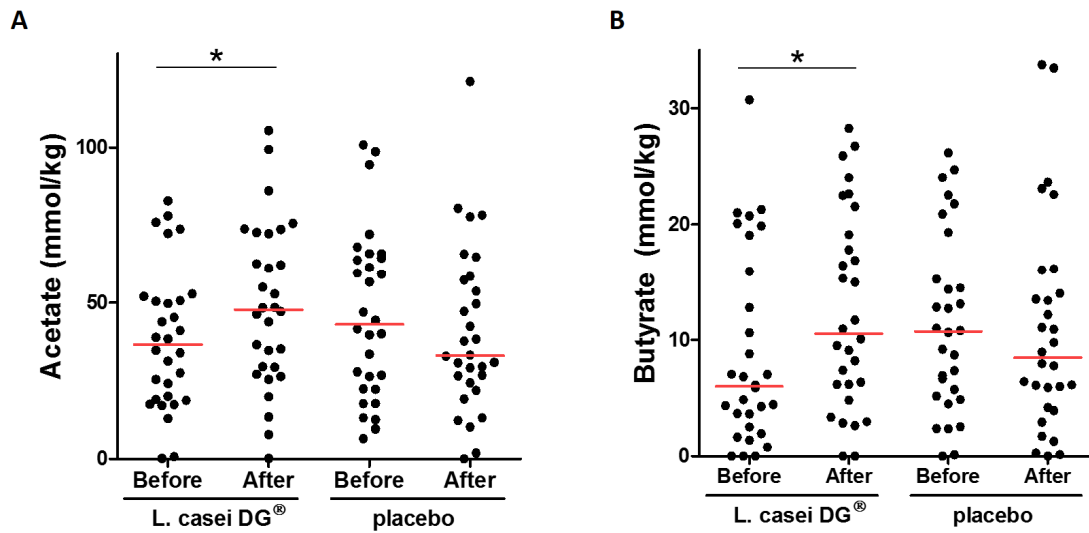

217
